# Supplementary material
Source: PubMed Central journal article supplement (PMC3954437)
Supplement: NIHMS551882-supplement-1.pdf [file NIHMS551882-supplement-1.pdf]

## Supplementary Information

### Supplementary Figures

Figure S1

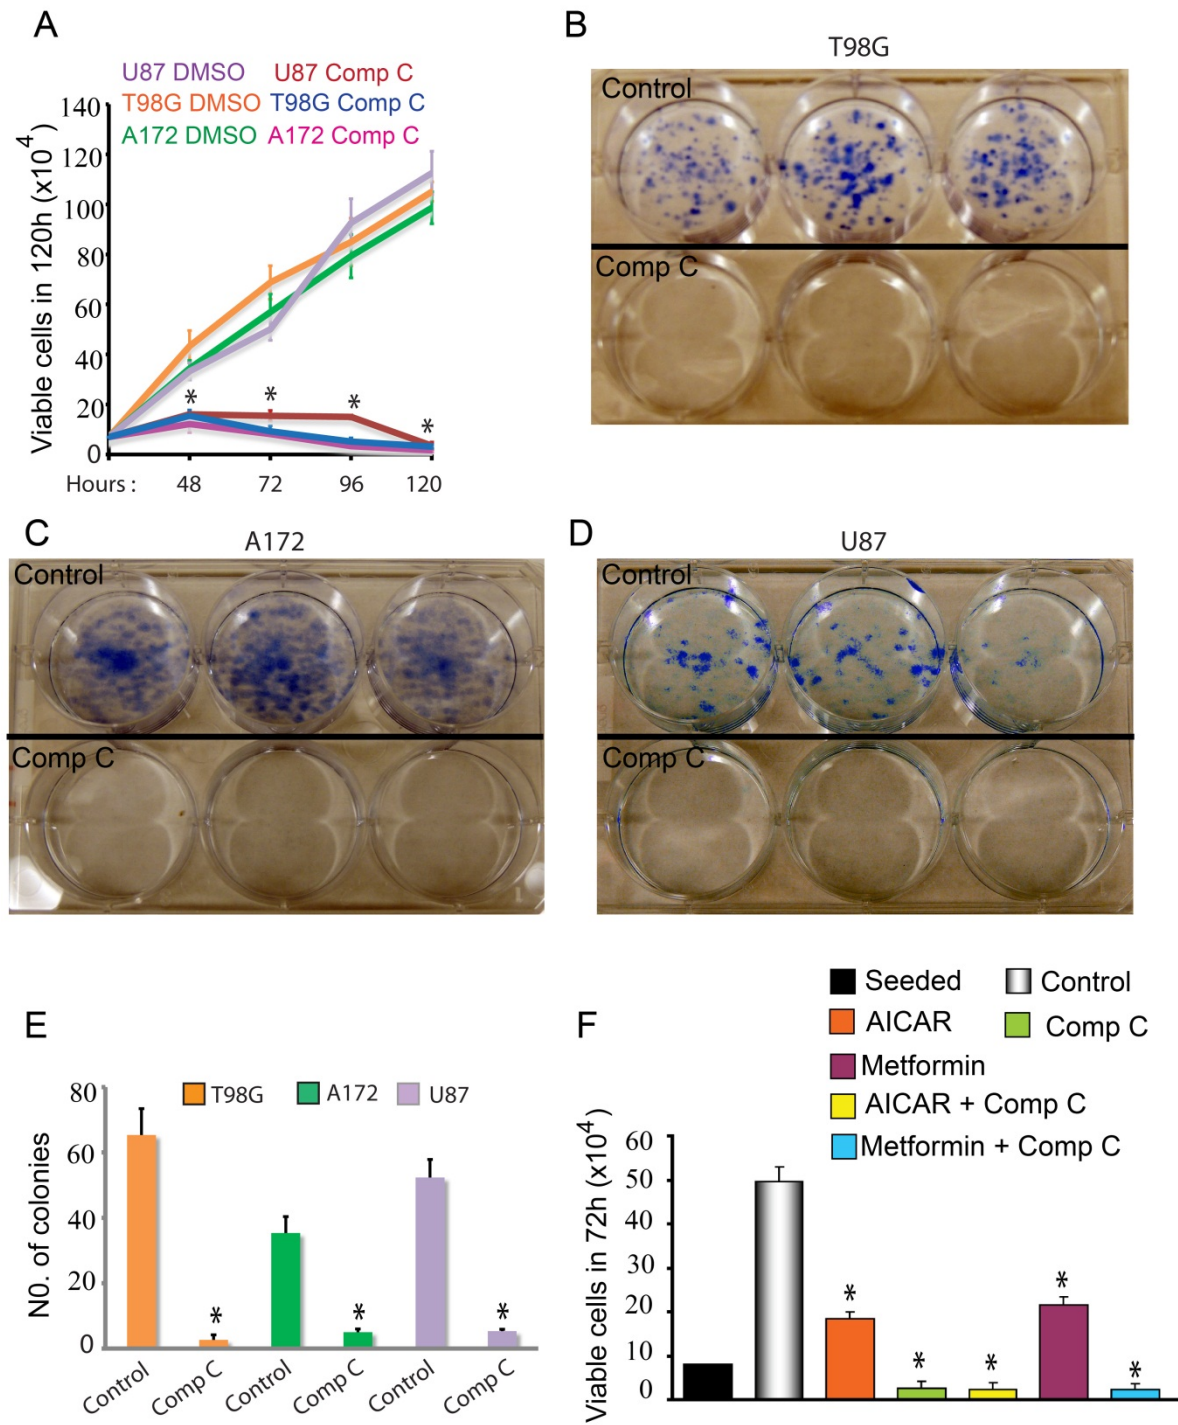

**Figure S1. Antiproliferative effects of Compound C in glioma cells.** (A) Proliferation analysis showing the effect of continuous treatment of glioma cells with Compound C or DMSO (control). Photomicrographs (B-D) and quantitation (E) of colony growth of three glioma cell lines grown in the presence of Compound C (5 $\mu$ M) or vehicle (DMSO). (F) Viability assay showing the antiproliferative actions of Compound C alone or in combination with AICAR (1mM), metformin (10mM). \*  $P \leq 0.001$ . Data shown is representative of three to five independent experiments.

Figure S2

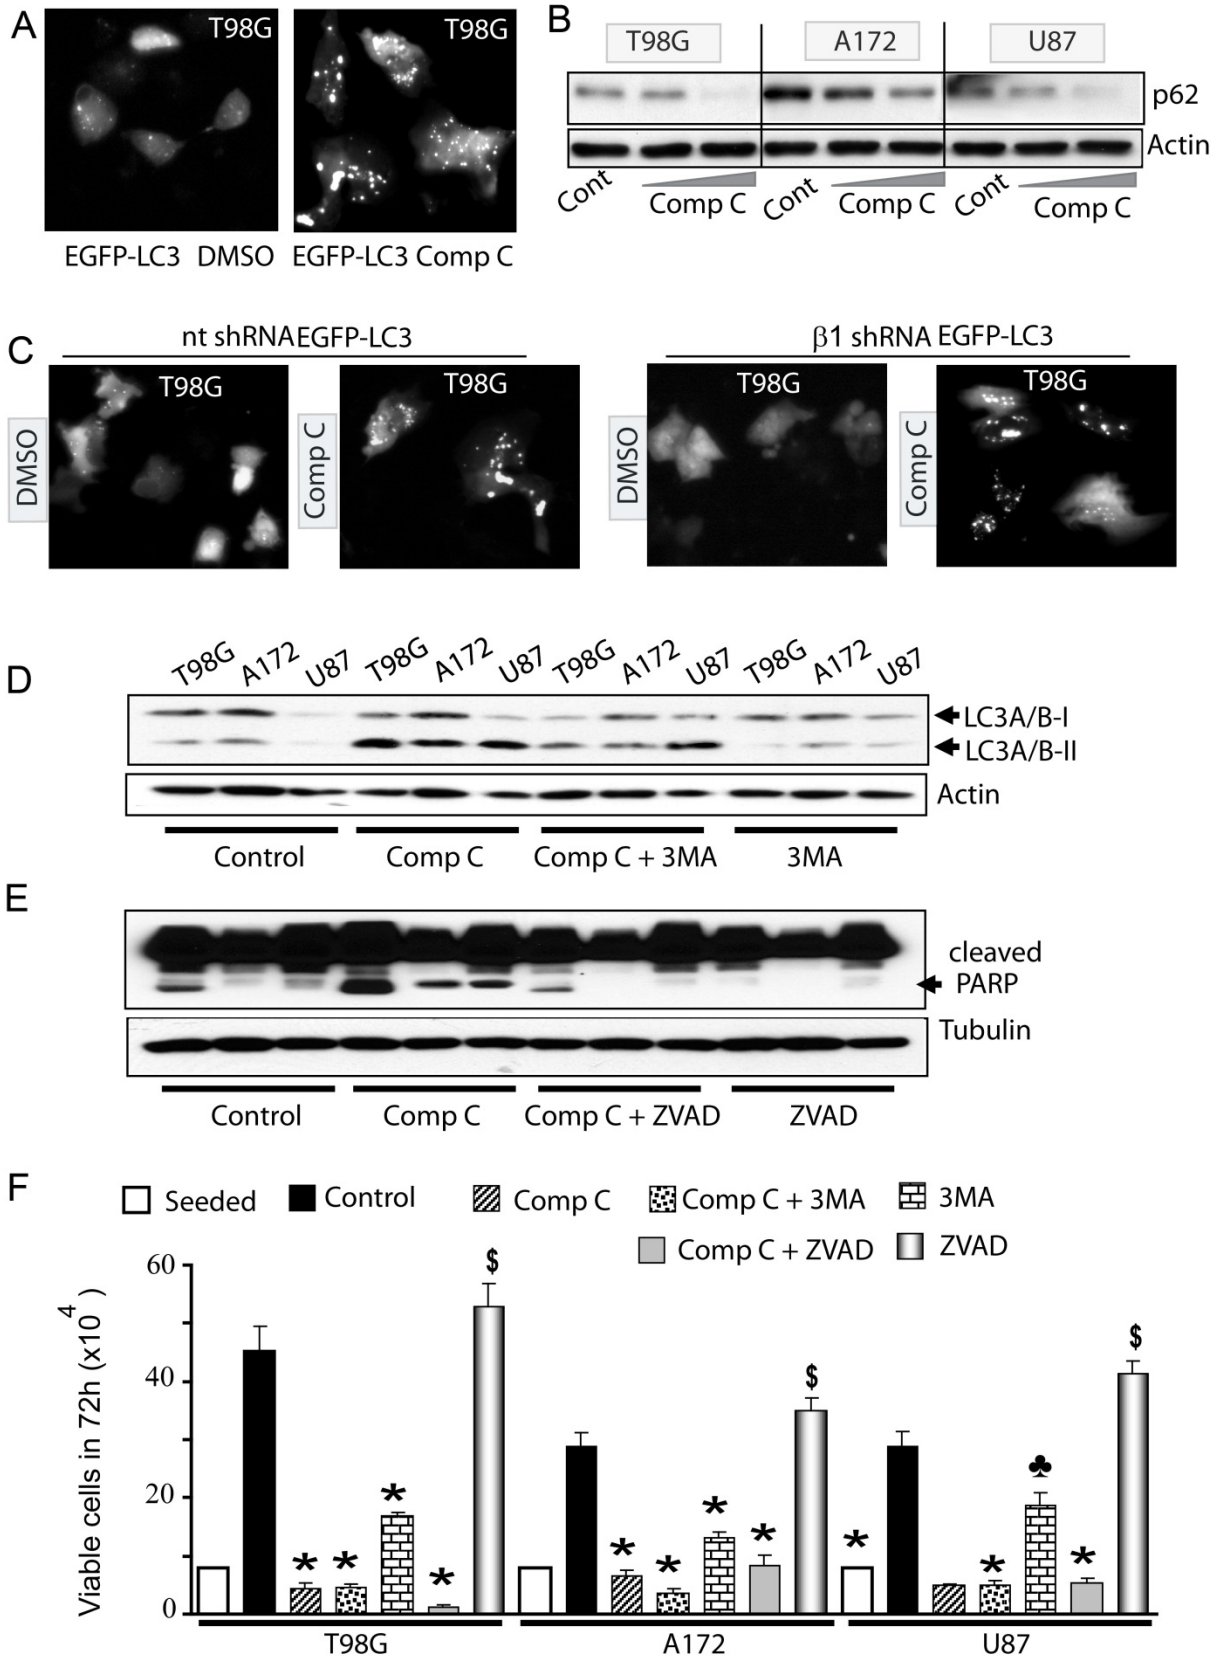

**Figure S2. Compound C induces AMPK-independent autophagy and the antiproliferative effects of Compound C are not blocked by autophagy and apoptosis inhibitors.** (A)

Immunofluorescence microscopy of glioma cells transfected with EGFP-LC3 and treated with either DMSO (control) or Compound C (5 $\mu$ M). Note, accumulation of LC3 positive autophagic puncta in EGFP-LC3 transfected glioma cells treated with Compound C. (B) Immunoblots showing degradation of autophagy substrate p62 in Compound C treated cells. (C) Immunofluorescence microscopy of control (nt) and AMPK  $\beta$ 1-silenced glioma cells transfected with EGFP-LC3 and treated with either DMSO (control) or Compound C (5 $\mu$ M). Note, accumulation of LC3 positive autophagic puncta in both control (nt) and AMPK  $\beta$ 1-silenced EGFP-LC3 transfected glioma cells treated with Compound C. (D, E) Immunoblots showing the effects of the autophagy inhibitor 3MA (5mM; D) and pan-Caspase inhibitor ZVAD (25 $\mu$ M; E) in reducing autophagy and apoptosis, respectively, alone or in the presence of Compound C. (F) Glioma cell viability assay showing the effects of Compound C alone or in the presence of the autophagy inhibitor 3MA or pan-Caspase inhibitor ZVAD. \*  $P \leq 0.005$ .; \$  $\leq 0.002$ ; ♣  $\leq 0.001$ . Data is representative of two to three independent experiments.

Figure S3

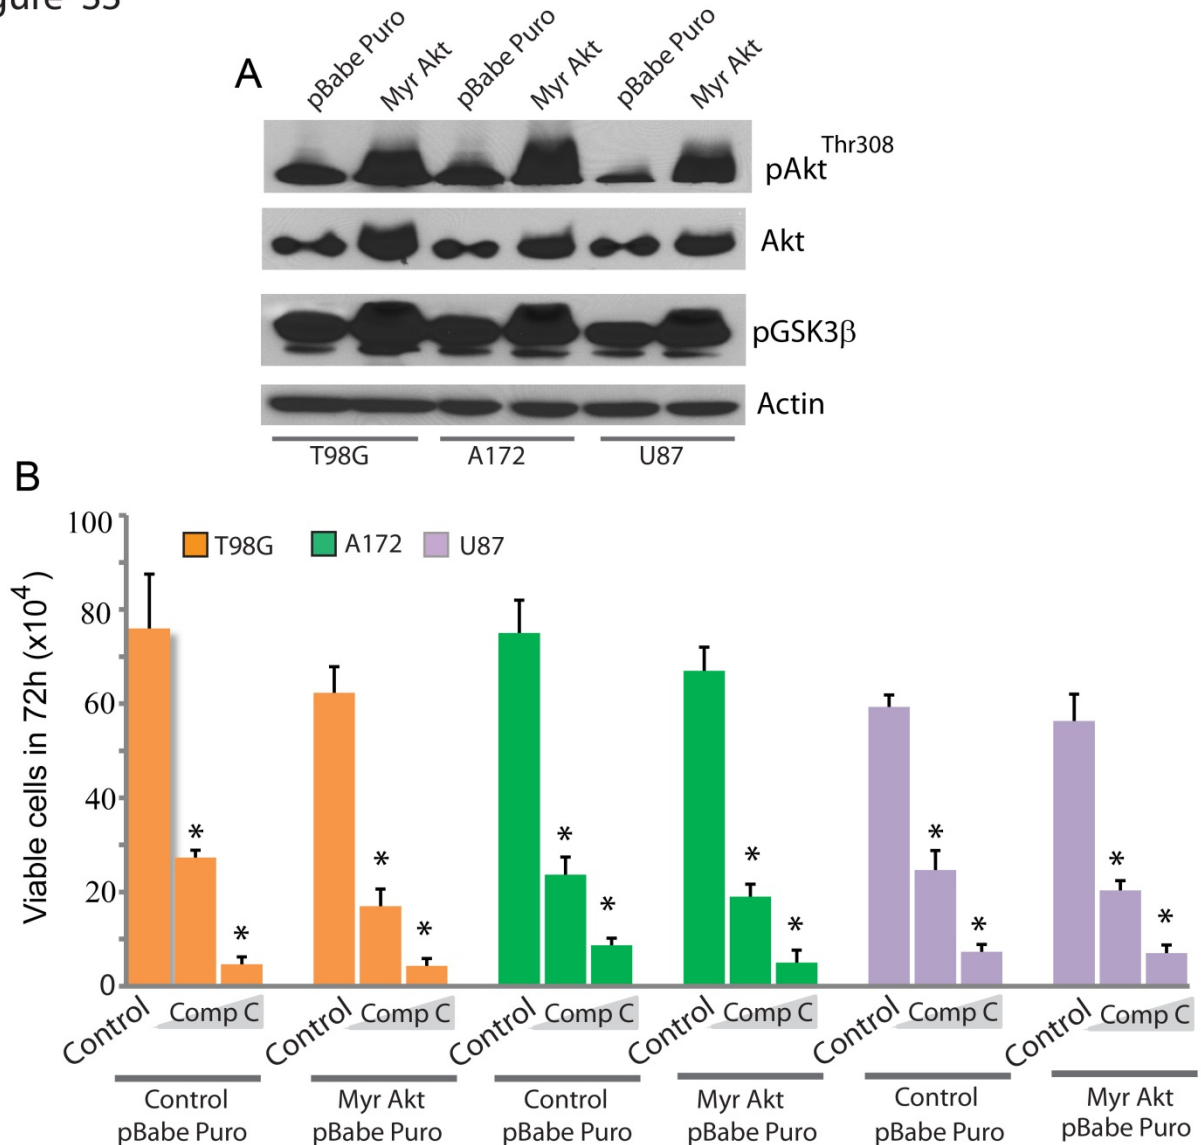

**Figure S3. Constitutively active Akt fails to block Compound C's antiproliferative action.**

(A) Immunoblot analysis of three glioma cells transfected with pBABE puro (empty vector) or pBABE puro Myr-Akt showing levels of total Akt, phosphorylated Akt and phosphorylated GSK3β. Actin was used as a protein loading control. (B) Viability assay of three glioma cells transfected with empty vector or Myr-Akt, treated with DMSO (control) or Compound C (5μM and 10μM). \* P ≤ 0.001. Data is representative of two independent experiments.

Figure S4

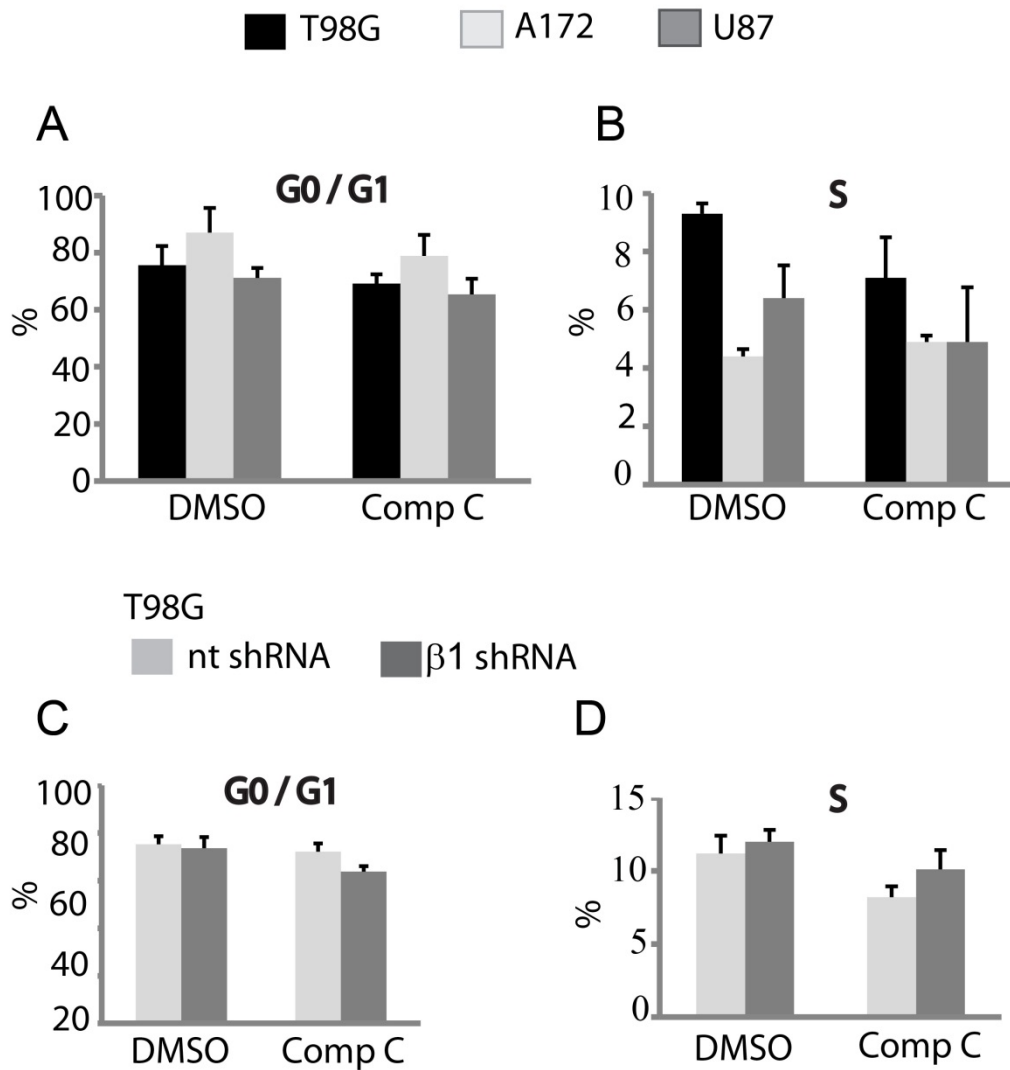

**Figure S4. Effects of Compound C on glioma cell cycle.** Quantitation from a flow cytometry-based cell cycle analysis of T98G, A172 and U87 glioma cells (A, B) treated with DMSO (control) and Compound C. Cells in G0/G1 and S phases are shown. (C, D) Similar analysis was done on control (nt) and AMPK  $\beta$ 1-silenced T98G glioma cells. Data shown is representative of two independent experiments.
